# Supplementary material for: A multi-hazard risk prioritisation framework for cultural heritage assets
Source: Copernicus journal article supplement (doi:10.5194/nhess-20-1391-2020), 2020-05-20
Supplement: Supplementary file 1 [file nhess-20-1391-2020-supplement.pdf]

Supplement of Nat. Hazards Earth Syst. Sci., 20, 1391–1414, 2020  
<https://doi.org/10.5194/nhess-20-1391-2020-supplement>  
© Author(s) 2020. This work is distributed under  
the Creative Commons Attribution 4.0 License.

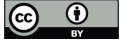

*Supplement of*

## **A multi-hazard risk prioritisation framework for cultural heritage assets**

**Giacomo Sevieri et al.**

*Correspondence to:* Giacomo Sevieri (g.sevieri@ucl.ac.uk)

The copyright of individual parts of the supplement might differ from the CC BY 4.0 License.

**GENERAL INFORMATION**

|                                            |                                                                                                                                                                                                                                                                                                                                                                                                                  |                          |                                                                                                       |
|--------------------------------------------|------------------------------------------------------------------------------------------------------------------------------------------------------------------------------------------------------------------------------------------------------------------------------------------------------------------------------------------------------------------------------------------------------------------|--------------------------|-------------------------------------------------------------------------------------------------------|
| <b>Date and Time:</b>                      |                                                                                                                                                                                                                                                                                                                                                                                                                  | <b>Surveyor Name:</b>    |                                                                                                       |
| <b>Address:</b>                            |                                                                                                                                                                                                                                                                                                                                                                                                                  | <b>Nearby Buildings:</b> | <input type="checkbox"/> Smaller <input type="checkbox"/> Same Height <input type="checkbox"/> Taller |
| <b>No. of Building Users:</b>              |                                                                                                                                                                                                                                                                                                                                                                                                                  | <b>GPS Co-Ordinates:</b> |                                                                                                       |
| <b>Construction Year:</b>                  |                                                                                                                                                                                                                                                                                                                                                                                                                  | <b>Confidence:</b>       | <input type="checkbox"/> H <input type="checkbox"/> M <input type="checkbox"/> L                      |
| <b>Shape and Composition of the Block:</b> | <input type="checkbox"/> Triangular Shape-Synchronic Growth <input type="checkbox"/> Elongated Shape-Synchronic Growth<br><input type="checkbox"/> Triangular Shape-Diachronic Growth <input type="checkbox"/> Elongated Shape-Diachronic Growth<br><input type="checkbox"/> Bulk Shape-Synchronic Growth <input type="checkbox"/> Individual Buildings<br><input type="checkbox"/> Bulk Shape-Diachronic Growth |                          |                                                                                                       |
| <b>Position in Block:</b>                  | <input type="checkbox"/> Corner <input type="checkbox"/> Mid-block <input type="checkbox"/> End-block <input type="checkbox"/> Isolated <input type="checkbox"/> Other:                                                                                                                                                                                                                                          |                          |                                                                                                       |
| <b>Type of Survey:</b>                     | <input type="checkbox"/> Desktop Review <input type="checkbox"/> Exterior <input type="checkbox"/> Part. Interior <input type="checkbox"/> Interior                                                                                                                                                                                                                                                              |                          |                                                                                                       |

**BUILDING INFORMATION**

|                                        |                                                                                                                                                  |                                                                                                                                                                                                                                                      |                                                                                  |
|----------------------------------------|--------------------------------------------------------------------------------------------------------------------------------------------------|------------------------------------------------------------------------------------------------------------------------------------------------------------------------------------------------------------------------------------------------------|----------------------------------------------------------------------------------|
| <b>Simple Building Plan</b>            | <b>No. of Stories:</b>                                                                                                                           |                                                                                                                                                                                                                                                      |                                                                                  |
|                                        | <b>Storey Height (m):</b>                                                                                                                        |                                                                                                                                                                                                                                                      |                                                                                  |
|                                        | <b>Average Height of Upper Horizontal Spandrel (m):</b>                                                                                          |                                                                                                                                                                                                                                                      |                                                                                  |
|                                        | <b>Connection of the Walls at the Edges (Exterior):</b>                                                                                          | <input type="checkbox"/> Adequate<br><input type="checkbox"/> Poor                                                                                                                                                                                   |                                                                                  |
|                                        | <b>Wall Openings Max. Dim. (m × m):</b>                                                                                                          |                                                                                                                                                                                                                                                      |                                                                                  |
|                                        | <b>Wall Openings Total Area (m<sup>2</sup>):</b>                                                                                                 |                                                                                                                                                                                                                                                      |                                                                                  |
|                                        | <b>Opening Layout:</b>                                                                                                                           | <input type="checkbox"/> Opening with Vertical Alignment at Both the Edges of Façade<br><input type="checkbox"/> Openings with Vertical Alignment at an Edge of the Façade<br><input type="checkbox"/> Central Column of Opening, Vertically Aligned |                                                                                  |
|                                        | <b>Opening Alignment:</b>                                                                                                                        | <input type="checkbox"/> Regular <input type="checkbox"/> Medium <input type="checkbox"/> Irregular                                                                                                                                                  |                                                                                  |
|                                        | <b>Dim. Between Int. Structural Wall (m × m):</b>                                                                                                |                                                                                                                                                                                                                                                      |                                                                                  |
|                                        | <b>Max. Thickness Ext. Walls (m):</b>                                                                                                            |                                                                                                                                                                                                                                                      | <b>Min. Thickness Ext. Walls (m):</b>                                            |
| <b>Max. Thickness Int. Walls (m):</b>  |                                                                                                                                                  | <b>Min. Thickness Int. Walls (m):</b>                                                                                                                                                                                                                |                                                                                  |
| <b>Non-Continuous Structural Wall:</b> | <input type="checkbox"/> Yes <input type="checkbox"/> No → Position:                                                                             |                                                                                                                                                                                                                                                      |                                                                                  |
| <b>Plan Regularity:</b>                | <input type="checkbox"/> Regular <input type="checkbox"/> Medium <input type="checkbox"/> Irregular                                              | <b>Confidence:</b>                                                                                                                                                                                                                                   | <input type="checkbox"/> H <input type="checkbox"/> M <input type="checkbox"/> L |
| <b>Height Regularity:</b>              | <input type="checkbox"/> Regular <input type="checkbox"/> Medium <input type="checkbox"/> Irregular                                              | <b>Confidence:</b>                                                                                                                                                                                                                                   | <input type="checkbox"/> H <input type="checkbox"/> M <input type="checkbox"/> L |
| <b>Drawings:</b>                       | <input type="checkbox"/> Yes <input type="checkbox"/> No <input type="checkbox"/> Structural <input type="checkbox"/> Architectural → File Name: |                                                                                                                                                                                                                                                      |                                                                                  |

**ROOF INFORMATION**

|                        |                                                                                                                                       |                                         |  | Unk                      | Confidence                                                                       |
|------------------------|---------------------------------------------------------------------------------------------------------------------------------------|-----------------------------------------|--|--------------------------|----------------------------------------------------------------------------------|
| <b>Type:</b>           | <input type="checkbox"/> Flat <input type="checkbox"/> Mono Pitch <input type="checkbox"/> Multi Pitch <input type="checkbox"/> Gable |                                         |  | <input type="checkbox"/> | <input type="checkbox"/> H <input type="checkbox"/> M <input type="checkbox"/> L |
| <b>Truss Material:</b> | <input type="checkbox"/> RC Slab <input type="checkbox"/> Timber <input type="checkbox"/> Steel <input type="checkbox"/> Other        |                                         |  | <input type="checkbox"/> | <input type="checkbox"/> H <input type="checkbox"/> M <input type="checkbox"/> L |
| <b>Slope (°):</b>      |                                                                                                                                       | <b>Soffit Width (m):</b>                |  | <input type="checkbox"/> | <input type="checkbox"/> H <input type="checkbox"/> M <input type="checkbox"/> L |
| <b>Panel Material:</b> | <input type="checkbox"/> Timber <input type="checkbox"/> Steel <input type="checkbox"/> Other                                         | <b>Thickness (mm):</b>                  |  | <input type="checkbox"/> | <input type="checkbox"/> H <input type="checkbox"/> M <input type="checkbox"/> L |
| <b>Fastener Type:</b>  | <input type="checkbox"/> Screw <input type="checkbox"/> Nail <input type="checkbox"/> Other                                           |                                         |  | <input type="checkbox"/> | <input type="checkbox"/> H <input type="checkbox"/> M <input type="checkbox"/> L |
| <b>No. of Purlins:</b> |                                                                                                                                       | <b>No. of Fasteners Per Purlin Bay:</b> |  | <input type="checkbox"/> | <input type="checkbox"/> H <input type="checkbox"/> M <input type="checkbox"/> L |

|                                 |                           |                                   |                   |                          |                       |
|---------------------------------|---------------------------|-----------------------------------|-------------------|--------------------------|-----------------------|
| <b>Fastener Dia. (mm):</b>      |                           | <b>Fastener Penetration (mm):</b> |                   | [ ]                      | [ ] H [ ] M [ ] L     |
| <b>Roof-to-Wall Connection:</b> | [ ] Simply Supported      | [ ] Pinned                        | [ ] Fixed Support | [ ]                      | [ ] H [ ] M [ ] L     |
| <b>Roof-Wall Fastener:</b>      | [ ] Metal Plate Connector | [ ] Single Hurricane Tie          |                   | [ ]                      | [ ] H [ ] M [ ] L     |
|                                 | [ ] Toe Nails             | [ ] Double Hurricane Tie          |                   | [ ]                      | [ ] H [ ] M [ ] L     |
| <b>Ornaments Type:</b>          |                           | <b>Material:</b>                  |                   | <b>Dimension(m × m):</b> | [ ] [ ] H [ ] M [ ] L |

## STRUCTURAL INFORMATION

|                                                   |                                   |                                                   |                     |       | Unk | Confidence        |
|---------------------------------------------------|-----------------------------------|---------------------------------------------------|---------------------|-------|-----|-------------------|
| <b>Material of Lateral Load Resisting System:</b> | [ ] Reinforced Concrete           | [ ] Reinforced Masonry                            | [ ] Other:          |       | [ ] | [ ] H [ ] M [ ] L |
|                                                   | [ ] Steel                         | [ ] Confined Masonry                              |                     |       |     |                   |
|                                                   | [ ] Masonry                       | [ ] Timber                                        |                     |       |     |                   |
| <b>Type of Lateral Load Resisting System:</b>     | [ ] Moment Resisting Frame System | [ ] RC Shear Wall                                 | [ ] Other:          |       | [ ] | [ ] H [ ] M [ ] L |
|                                                   | [ ] Bracing                       | [ ] Load Bearing Walls                            |                     |       |     |                   |
|                                                   |                                   | [ ] Combined                                      |                     |       |     |                   |
| <b>Structural Condition:</b>                      | [ ] Poor / Deteriorated           | [ ] Good / Fair                                   | [ ] Excellent / New |       | [ ] | [ ] H [ ] M [ ] L |
| <b>Environmental Exposure:</b>                    | [ ] Dry Environment               | [ ] Aggressive Chemical Environment               |                     |       | [ ] | [ ] H [ ] M [ ] L |
|                                                   | [ ] Moisture or Wetting           | [ ] Saturated Salt Air                            |                     |       |     |                   |
| <b>Foundation Type:</b>                           | [ ] Deep                          | [ ] Superficial                                   | [ ] Not Accessible  | Note: | [ ] | [ ] H [ ] M [ ] L |
| <b>Floor Type:</b>                                | [ ] Timber                        | [ ] Concrete                                      |                     |       | [ ] | [ ] H [ ] M [ ] L |
| <b>Load Distribution:</b>                         | [ ] One-Way Spanning              | [ ] Two-Way Spanning                              |                     |       | [ ] | [ ] H [ ] M [ ] L |
| <b>Floor-to-Wall Connection:</b>                  | [ ] Simply Supported              | [ ] Steel Bars                                    | [ ] RC Ring Beam    |       | [ ] | [ ] H [ ] M [ ] L |
| <b>Retrofitting:</b>                              | [ ] Yes [ ] No                    | <b>Description:</b>                               |                     |       | [ ] | [ ] H [ ] M [ ] L |
| <b>Modifications:</b>                             | [ ] Yes [ ] No                    | → Position:                                       |                     |       | [ ] | [ ] H [ ] M [ ] L |
|                                                   | [ ] Addition of Stories           | [ ] Extension of Plan                             |                     |       |     |                   |
|                                                   | [ ] Wall Opening Framing          |                                                   |                     |       |     |                   |
|                                                   | [ ] Steel Frame Opening           | → Position:                                       |                     |       |     |                   |
| <b>Vulnerability Factors:</b>                     | [ ] Balconies                     | [ ] Short Column                                  |                     |       |     |                   |
|                                                   | [ ] Parapet                       | [ ] Strong Beam-Weak Column                       |                     |       |     |                   |
|                                                   | [ ] Gable                         | [ ] Soft Storey                                   |                     |       |     |                   |
|                                                   | [ ] Pounding                      | [ ] Roof Thrust → Length x Height (m):            |                     |       |     |                   |
|                                                   | [ ] Mass Irregularity             | [ ] Vaults / arches → Length x Height (m):        |                     |       |     |                   |
|                                                   | [ ] Built on Slope                | [ ] Connection Between Orthogonal Wall (Interior) |                     |       |     |                   |
|                                                   | [ ] Built on Stilts               | [ ] Existing Cracks → Info:                       |                     |       |     |                   |
|                                                   | [ ] Other:                        |                                                   |                     |       |     |                   |

## MASONRY

|                                     |                                                    |                              |                        |  | Unk | Confidence        |
|-------------------------------------|----------------------------------------------------|------------------------------|------------------------|--|-----|-------------------|
| <b>Masonry Type:</b>                | [ ] Chaotic Stone                                  | [ ] Masonry with Hewn Blocks |                        |  | [ ] | [ ] H [ ] M [ ] L |
|                                     | [ ] Hollow Brick                                   | [ ] Regular Sized Stone      |                        |  |     |                   |
|                                     | [ ] Soft Stone Block                               | [ ] Adobe bricks             |                        |  |     |                   |
|                                     | [ ] Squared Stone Blocks                           |                              |                        |  |     |                   |
|                                     | [ ] Solid Brick Masonry and Lime Mortar            |                              |                        |  |     |                   |
|                                     | [ ] Hollow Brick with Cement Mortar                |                              |                        |  |     |                   |
|                                     | [ ] Hollow Brick without Mortar in Vertical Joints |                              |                        |  |     |                   |
|                                     | [ ] Concrete Blocks or Expanded Clay Blocks        |                              |                        |  |     |                   |
|                                     | [ ] Concrete Hollow Blocks                         |                              |                        |  |     |                   |
| <b>Mortar Type &amp; Thickness:</b> | [ ] Cement                                         | [ ] Mud                      | <b>Thickness (mm):</b> |  | [ ] | [ ] H [ ] M [ ] L |
|                                     | [ ] Mud with Cement                                | [ ] Lime                     |                        |  |     |                   |
|                                     | [ ] Lime with Bricks                               | [ ] Other:                   |                        |  |     |                   |
| <b>Maintenance:</b>                 | [ ] Low                                            | [ ] Medium                   | [ ] High               |  | [ ] | [ ] H [ ] M [ ] L |
| <b>Water Infiltration:</b>          | [ ] Low                                            | [ ] Medium                   | [ ] High               |  | [ ] | [ ] H [ ] M [ ] L |
| <b>Mortar Loss:</b>                 | [ ] Low                                            | [ ] Medium                   | [ ] High               |  | [ ] | [ ] H [ ] M [ ] L |

|                                        |                                                                                        |                                     |                                                                                            |                          |                                                                                  |
|----------------------------------------|----------------------------------------------------------------------------------------|-------------------------------------|--------------------------------------------------------------------------------------------|--------------------------|----------------------------------------------------------------------------------|
| <b>Transversal Connection Quality:</b> | <input type="checkbox"/> Low                                                           | <input type="checkbox"/> Medium     | <input type="checkbox"/> High                                                              | <input type="checkbox"/> | <input type="checkbox"/> H <input type="checkbox"/> M <input type="checkbox"/> L |
| <b>Average Size of the Units (mm):</b> |                                                                                        |                                     |                                                                                            | <input type="checkbox"/> | <input type="checkbox"/> H <input type="checkbox"/> M <input type="checkbox"/> L |
| <b>Wall Tie Presence:</b>              | <input type="checkbox"/> Yes <input type="checkbox"/> No                               |                                     |                                                                                            | <input type="checkbox"/> | <input type="checkbox"/> H <input type="checkbox"/> M <input type="checkbox"/> L |
| <b>No. of Leaves:</b>                  | <input type="checkbox"/> Single-Leaf                                                   | <input type="checkbox"/> Multi-Leaf | <b>No. of Header Courses:</b>                                                              | <input type="checkbox"/> | <input type="checkbox"/> H <input type="checkbox"/> M <input type="checkbox"/> L |
| <b>Wall Core:</b>                      | <input type="checkbox"/> Yes <input type="checkbox"/> No                               | <b>Quality:</b>                     | <input type="checkbox"/> Poor <input type="checkbox"/> Thick <input type="checkbox"/> Good | <input type="checkbox"/> | <input type="checkbox"/> H <input type="checkbox"/> M <input type="checkbox"/> L |
| <b>Masonry Improvements:</b>           | <input type="checkbox"/> Mixture Injection <input type="checkbox"/> Concrete Jacketing |                                     |                                                                                            | <input type="checkbox"/> | <input type="checkbox"/> H <input type="checkbox"/> M <input type="checkbox"/> L |
| <b>Material Test Results:</b>          | Attached File Name:                                                                    |                                     |                                                                                            | <input type="checkbox"/> | <input type="checkbox"/> H <input type="checkbox"/> M <input type="checkbox"/> L |

### CONCRETE / CONFINED MASONRY

|                                |                                                                                                               |  |                                                            |                                  | Unk                      | Confidence                                                                       |
|--------------------------------|---------------------------------------------------------------------------------------------------------------|--|------------------------------------------------------------|----------------------------------|--------------------------|----------------------------------------------------------------------------------|
| <b>No. of Frames:</b>          | <b>X:</b>                                                                                                     |  | <b>Y:</b>                                                  | <b>(If ≠ 0, Fill Rows Below)</b> | <input type="checkbox"/> | <input type="checkbox"/> H <input type="checkbox"/> M <input type="checkbox"/> L |
| <b>Beam section (m × m):</b>   |                                                                                                               |  |                                                            |                                  | <input type="checkbox"/> | <input type="checkbox"/> H <input type="checkbox"/> M <input type="checkbox"/> L |
| <b>Column section (m × m):</b> |                                                                                                               |  |                                                            |                                  | <input type="checkbox"/> | <input type="checkbox"/> H <input type="checkbox"/> M <input type="checkbox"/> L |
| <b>Reinforced Bars:</b>        | <input type="checkbox"/> Deformed <input type="checkbox"/> Smooth                                             |  |                                                            |                                  | <input type="checkbox"/> | <input type="checkbox"/> H <input type="checkbox"/> M <input type="checkbox"/> L |
| <b>Infilled:</b>               | <input type="checkbox"/> Yes <input type="checkbox"/> No                                                      |  | <input type="checkbox"/> Confined Masonry                  |                                  | <input type="checkbox"/> | <input type="checkbox"/> H <input type="checkbox"/> M <input type="checkbox"/> L |
| <b>Infill Wall Material:</b>   | <input type="checkbox"/> Timber Plates <input type="checkbox"/> Concrete Block <input type="checkbox"/> Brick |  |                                                            |                                  | <input type="checkbox"/> | <input type="checkbox"/> H <input type="checkbox"/> M <input type="checkbox"/> L |
|                                | Thickness (mm): <input type="checkbox"/> Other:                                                               |  | <input type="checkbox"/> Adobe                             |                                  |                          |                                                                                  |
| <b>Mortar Type:</b>            | <input type="checkbox"/> None <input type="checkbox"/> Cement                                                 |  | <input type="checkbox"/> Lime <input type="checkbox"/> Mud |                                  | <input type="checkbox"/> | <input type="checkbox"/> H <input type="checkbox"/> M <input type="checkbox"/> L |

Confidence: Unk=Unknown, H=High, M=Medium, L=Low

Any extra comments can be added on the back of the sheet.

### Notes: Vulnerability factors

- a. Short column** At least 20% of the columns in the same Lateral Resisting System (LRS) have a height/depth ratio less than 50% of the average height/depth at that level
- b. Pounding** The building is closer than 0.2 m from an adjacent building
- c. Soft storey** Infills are missing at a one level
- d. Strong Beam-Weak column** The beams are evidently stronger than the columns to which they are connected
- e. Built on Slope** There is a sensible grade change from one side of the to the other
- f. Plan irregularity**
  - 1) The LRSs do not appear relatively well distributed in plan in either or both directions
  - 2) Two or more LRSs are not orthogonal to each other
  - 3) Re-entrant corners exceed the 25% of the plan dimension
  - 4) There is an opening in the diaphragm with a width over 50% of the total diaphragm width at that level
- g. Elevation Irregularity**
  - 1) The storey height is not sufficiently uniform
  - 2) Vertical elements of the LRS at upper stories are inboard of those at lower stories
- h. Mass Irregularity** The area of a given storey is substantially different from the adjacent one
